# Supplementary material for: Crosstalk between adult human retinas: exploring neurovascular coupling through photic stimulation for contralateral retina reflex insights.
Source: Research Square preprint supplement (doi:10.21203/rs.3.rs-4357671/v2), 2024-10-24
Supplement: Supplementary file 1 [file 516597d01f6be3778e0927d8.pdf]

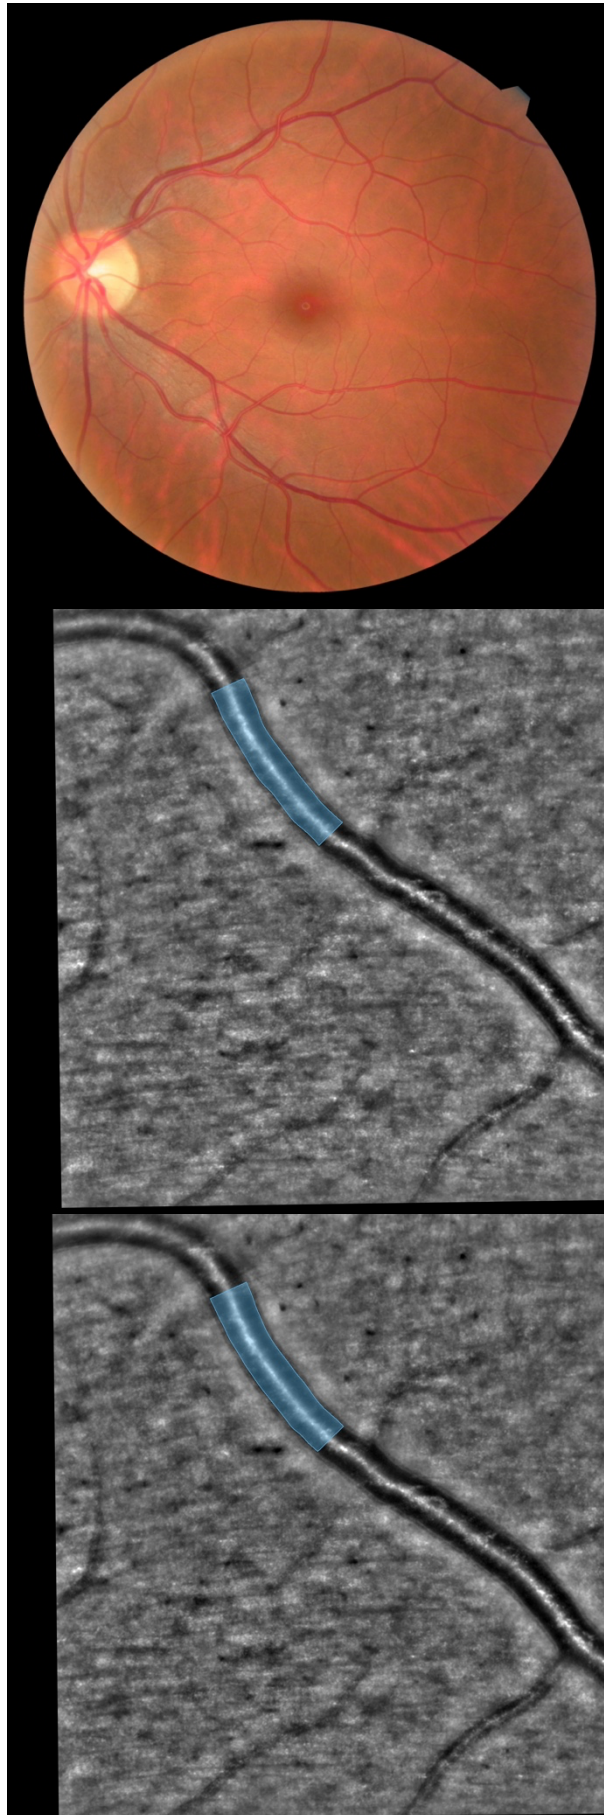

Healthy control's left eye (HC03 case). Top: Color fundus photography. Middle: rtx1 fundus after contralateral photic stimulation. Right: rtx1 fundus after ipsilateral photic stimulation.

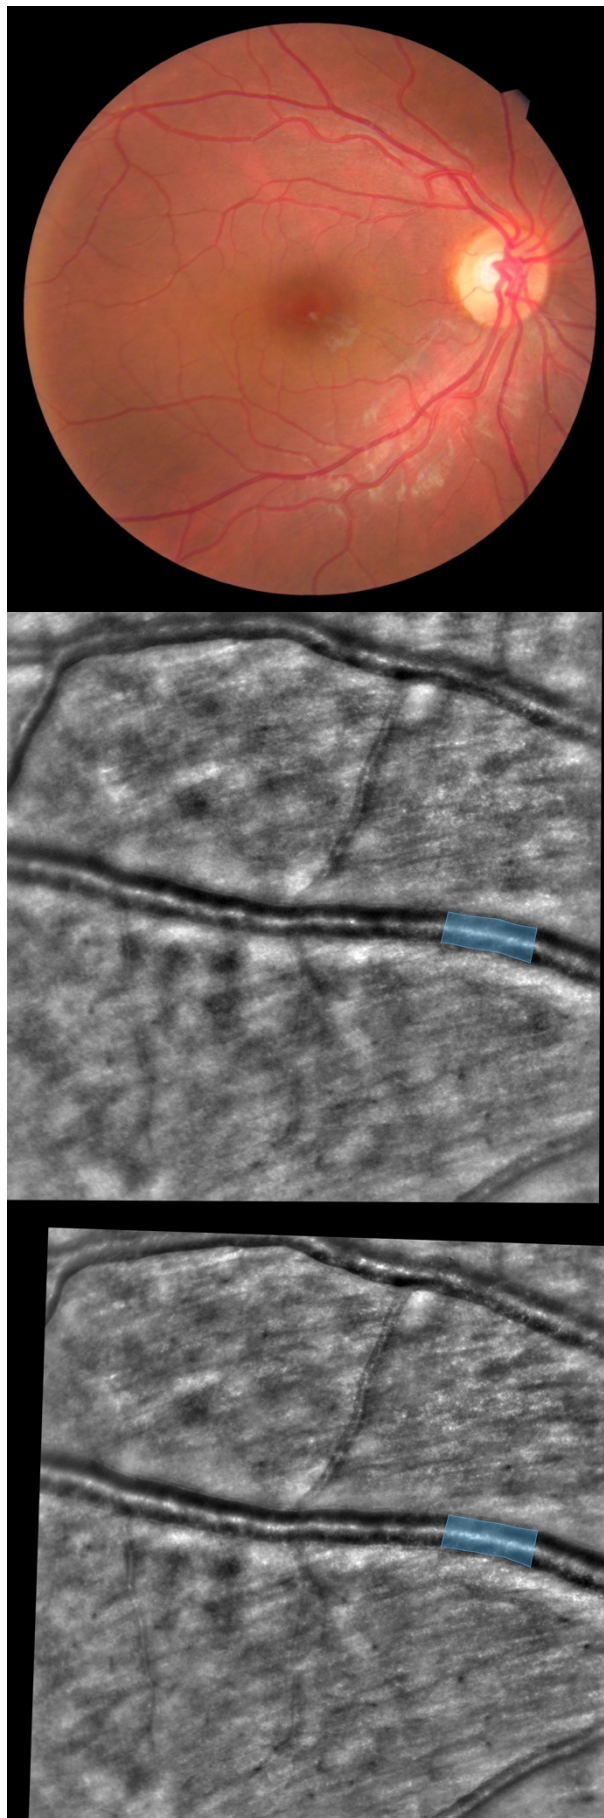

Healthy control's right eye (HC08 case). Top: Color fundus photography. Middle: rtx1 fundus after contralateral photic stimulation. Right: rtx1 fundus after ipsilateral photic stimulation.

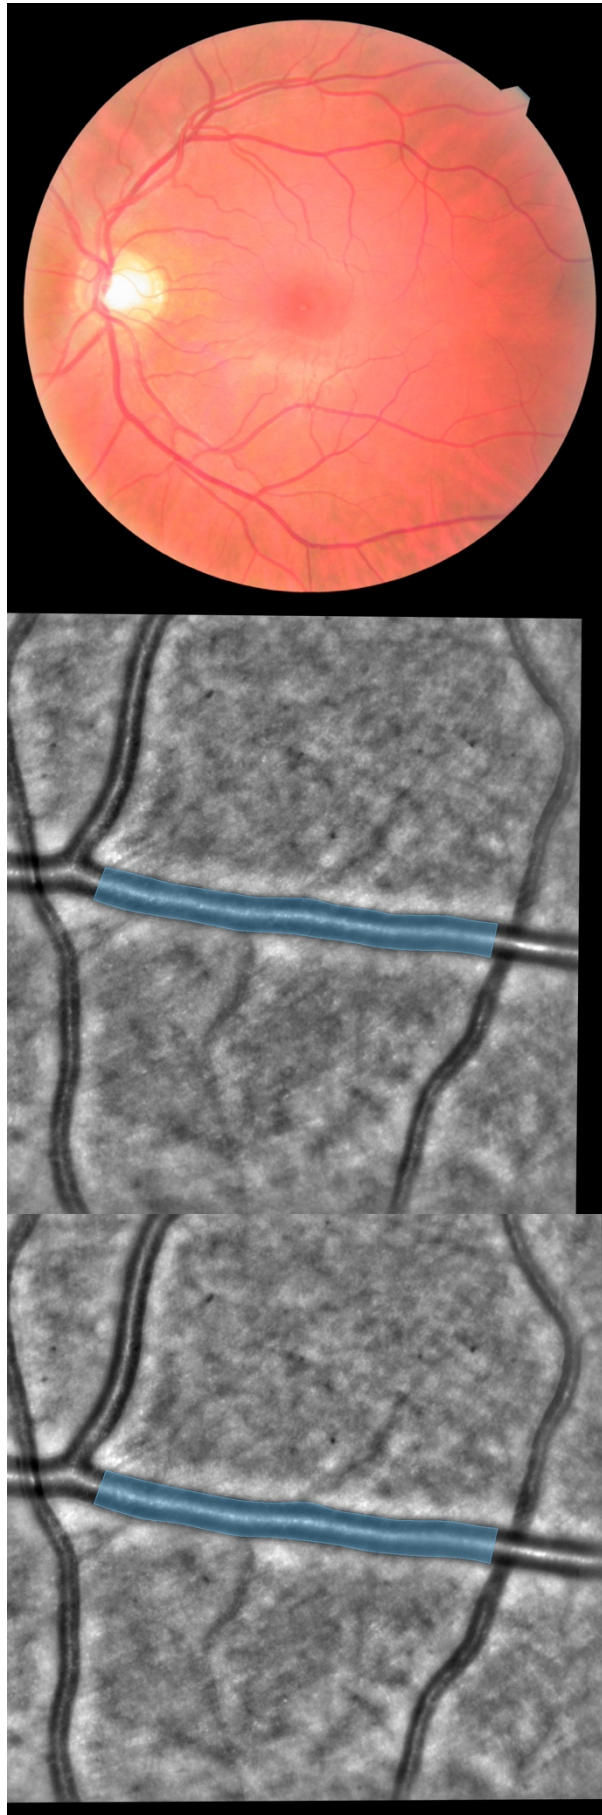

Diabetic patient's left eye (DM02 case). Top: Color fundus photography. Middle: rtx1 fundus after contralateral photic stimulation. Right: rtx1 fundus after ipsilateral photic stimulation.

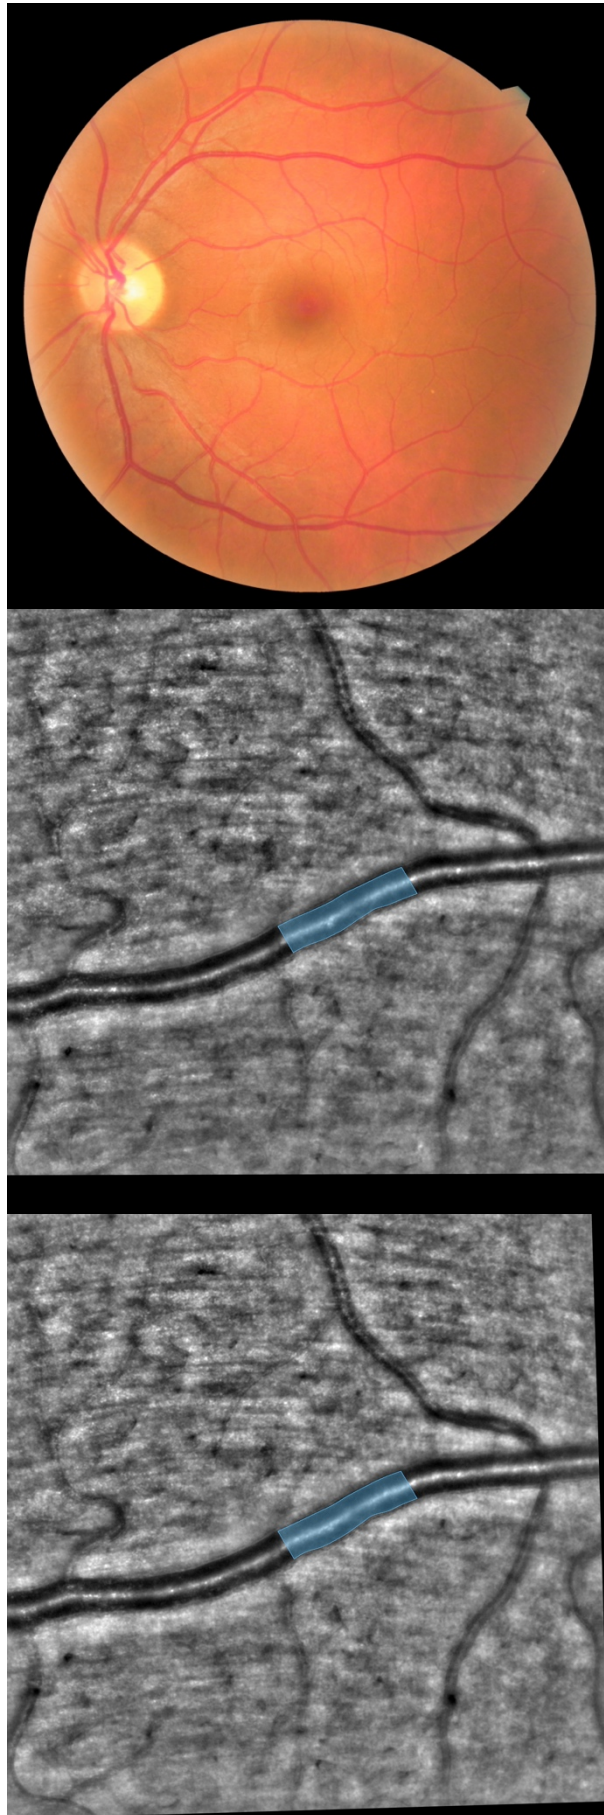

Diabetic patient's left eye (DM04 case). Top: Color fundus photography. Middle: rtx1 fundus after contralateral photic stimulation. Right: rtx1 fundus after ipsilateral photic stimulation.
